# Supplementary material
Source: PubMed Central journal article supplement (PMC2811967)

## Supplemental Figure 9a

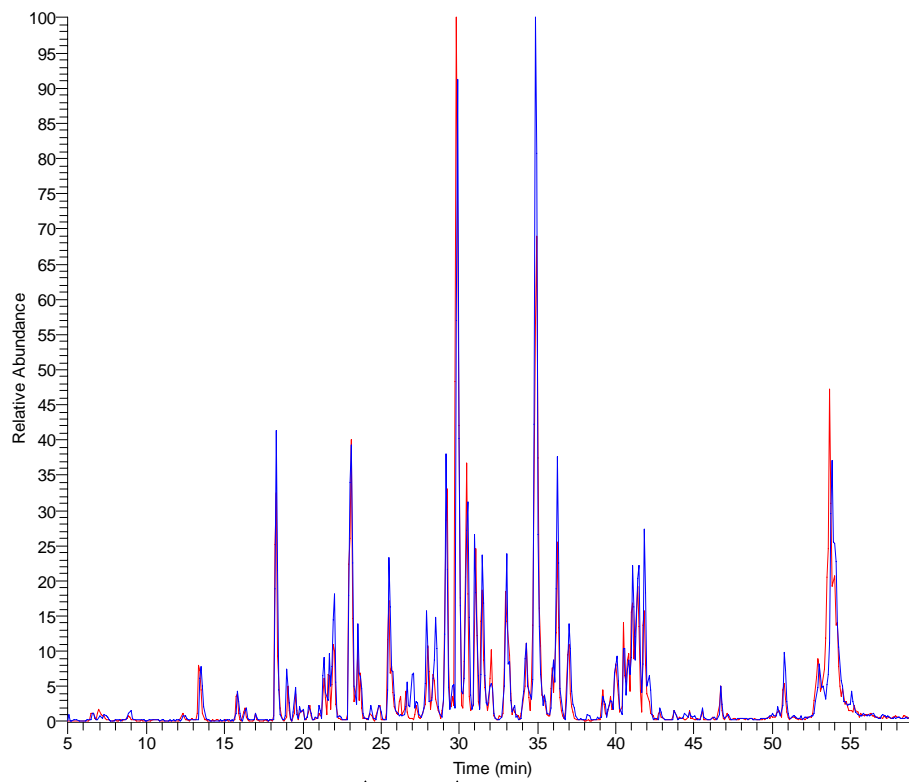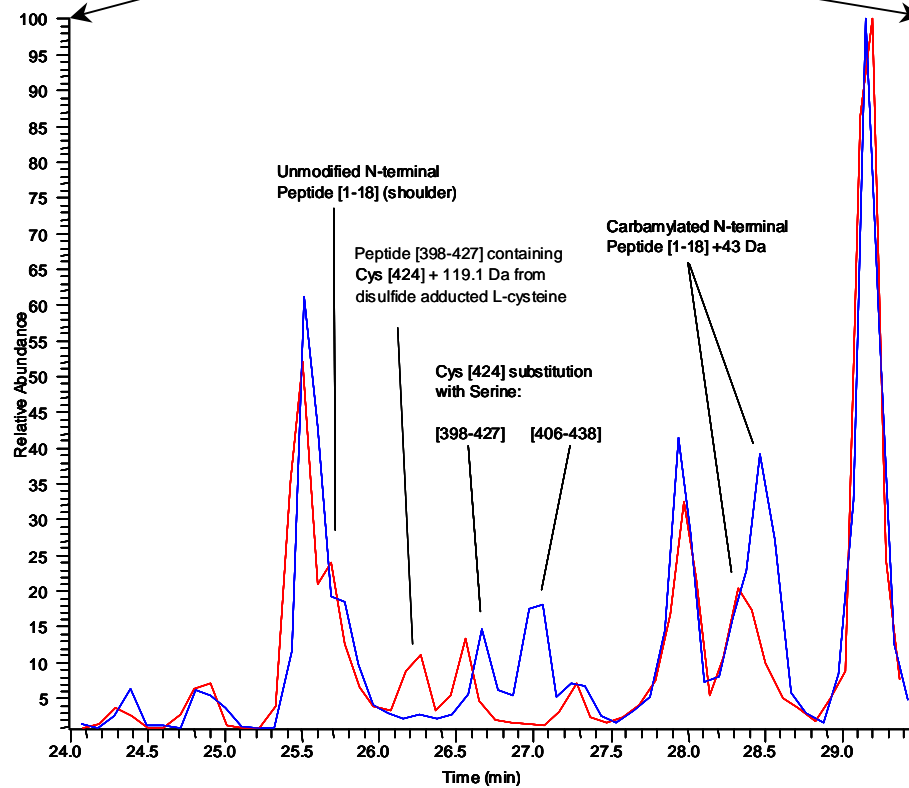

# Supplemental Figure 9b

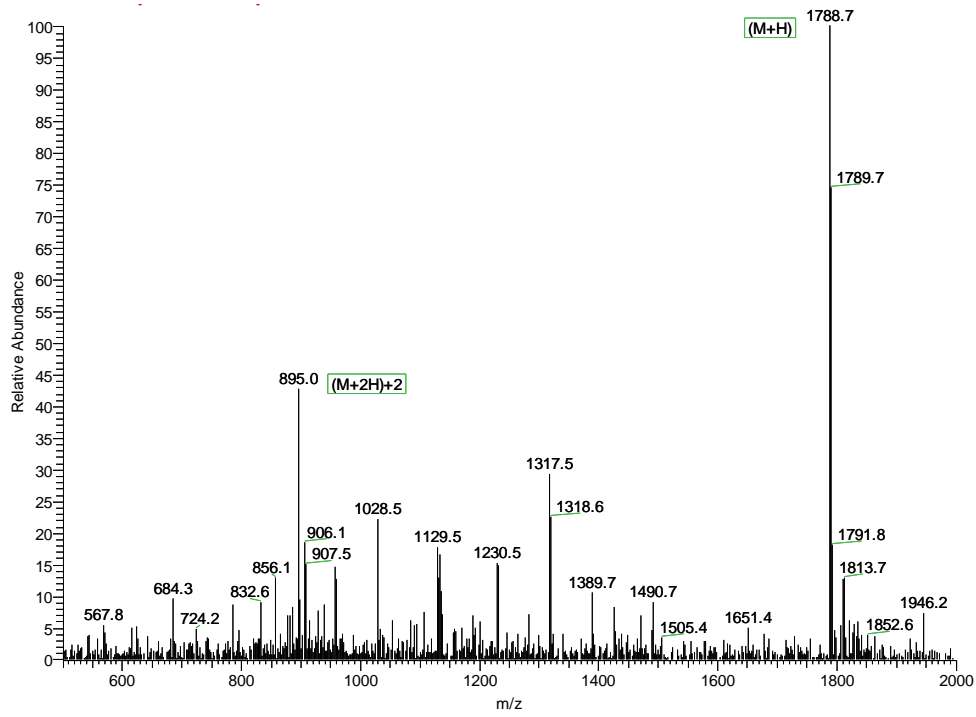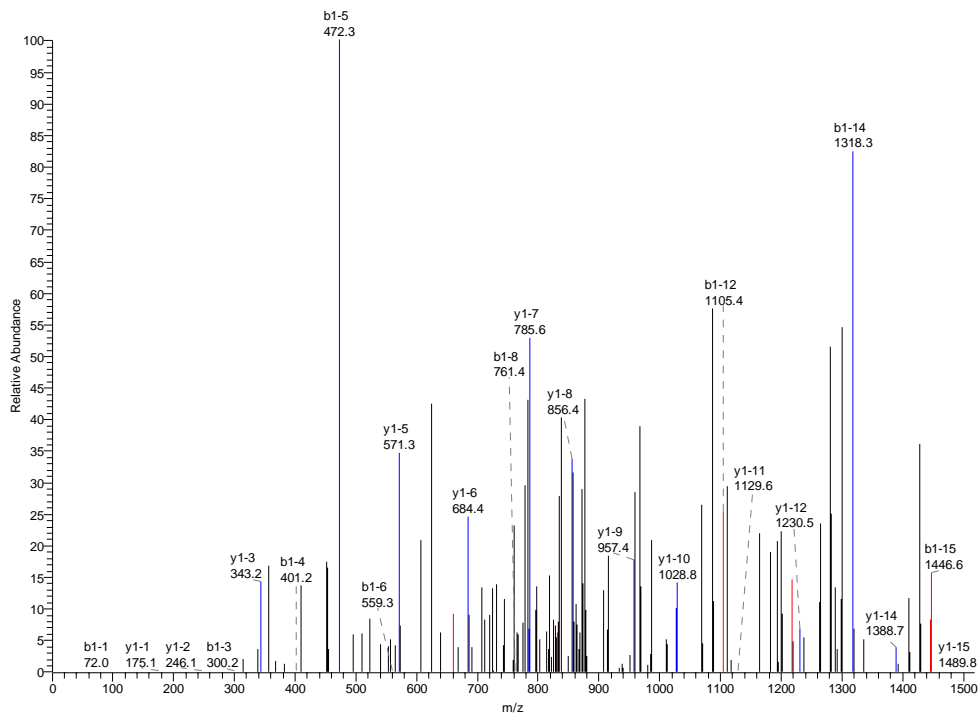

# Supplemental Figure 9c

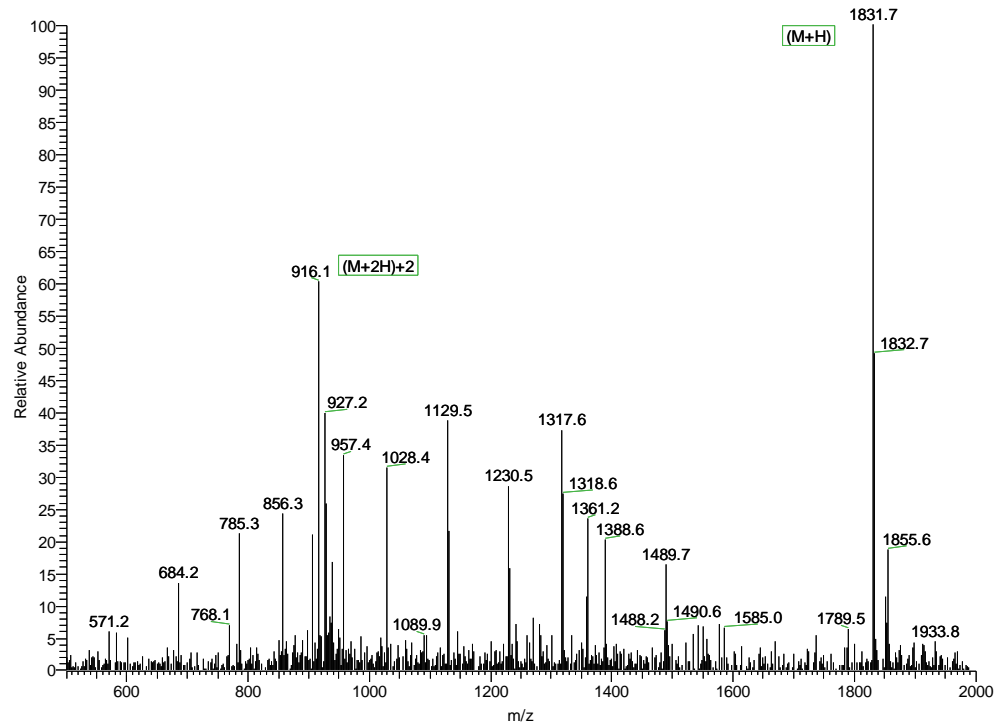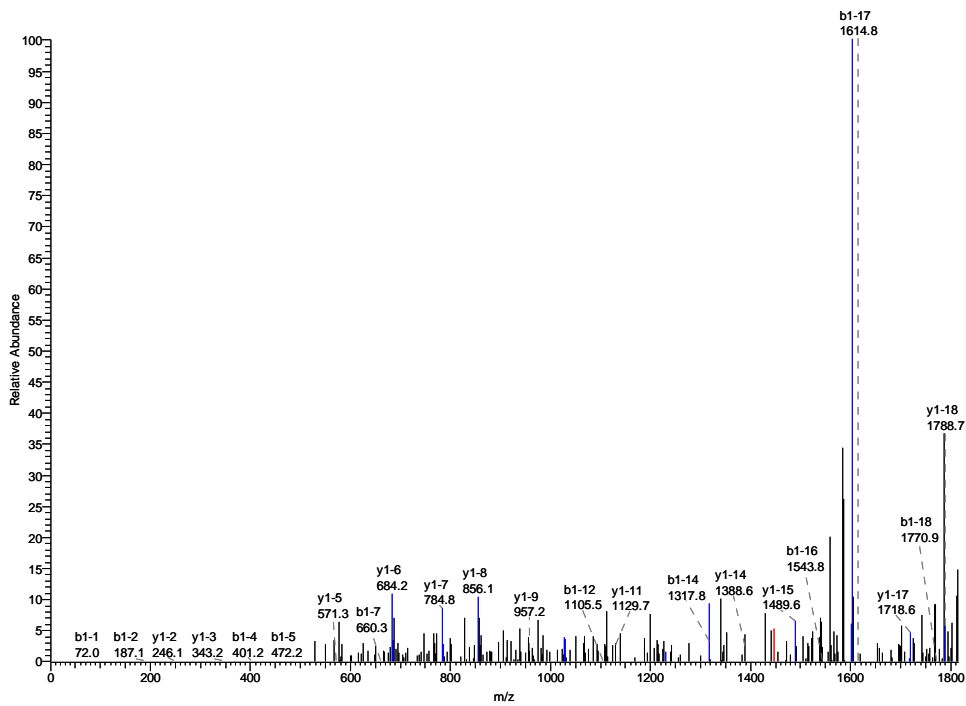

# Supplemental Figure 9d

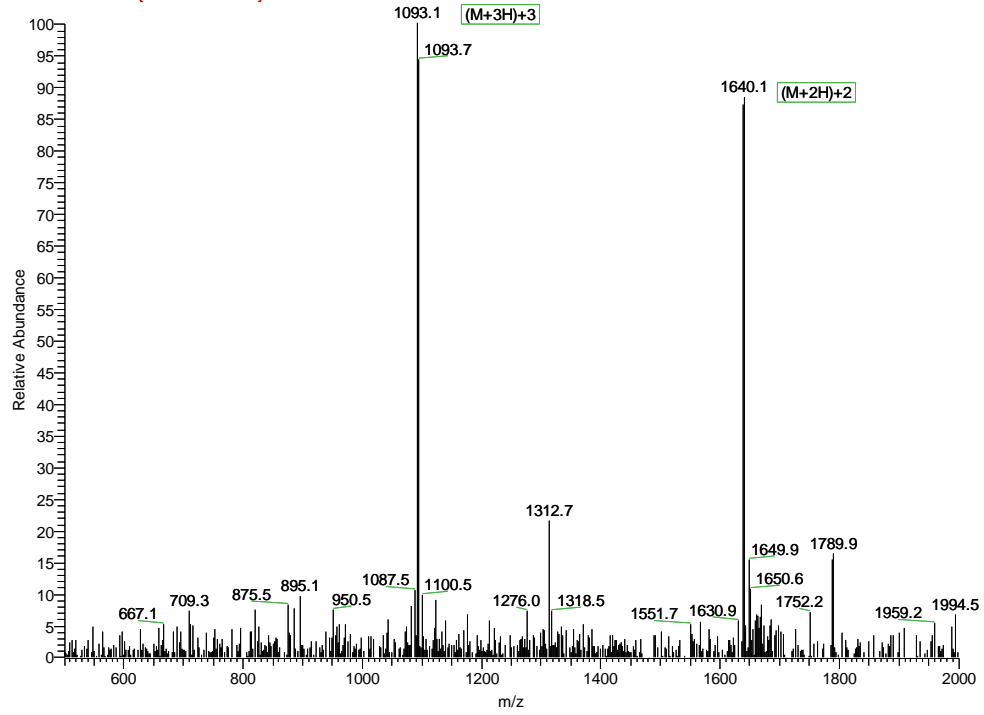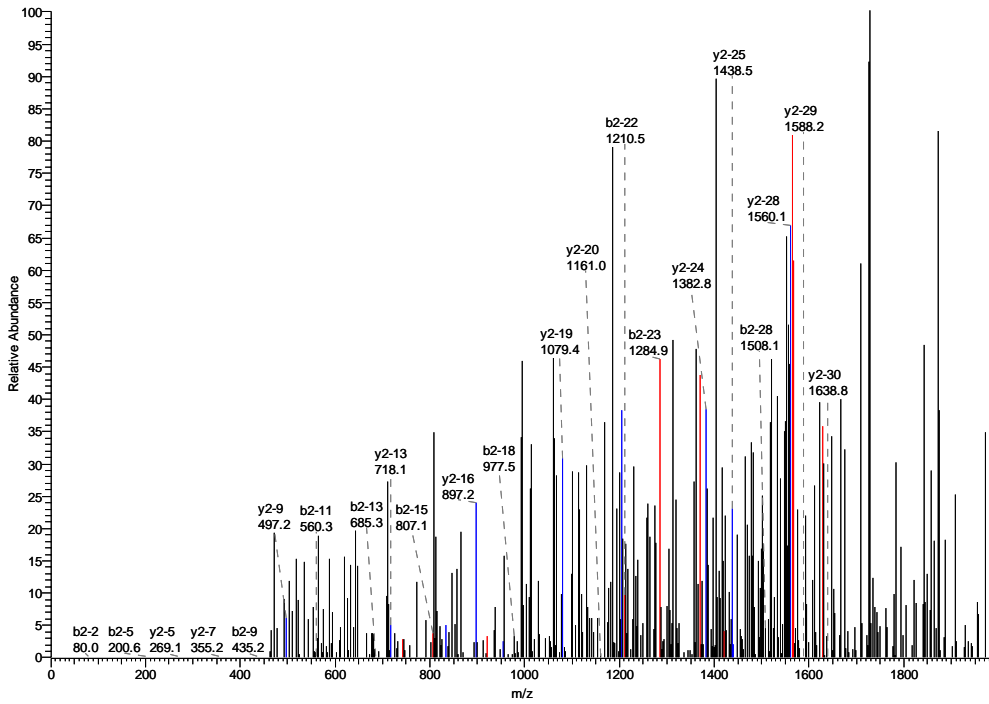

# Supplemental Figure 9e

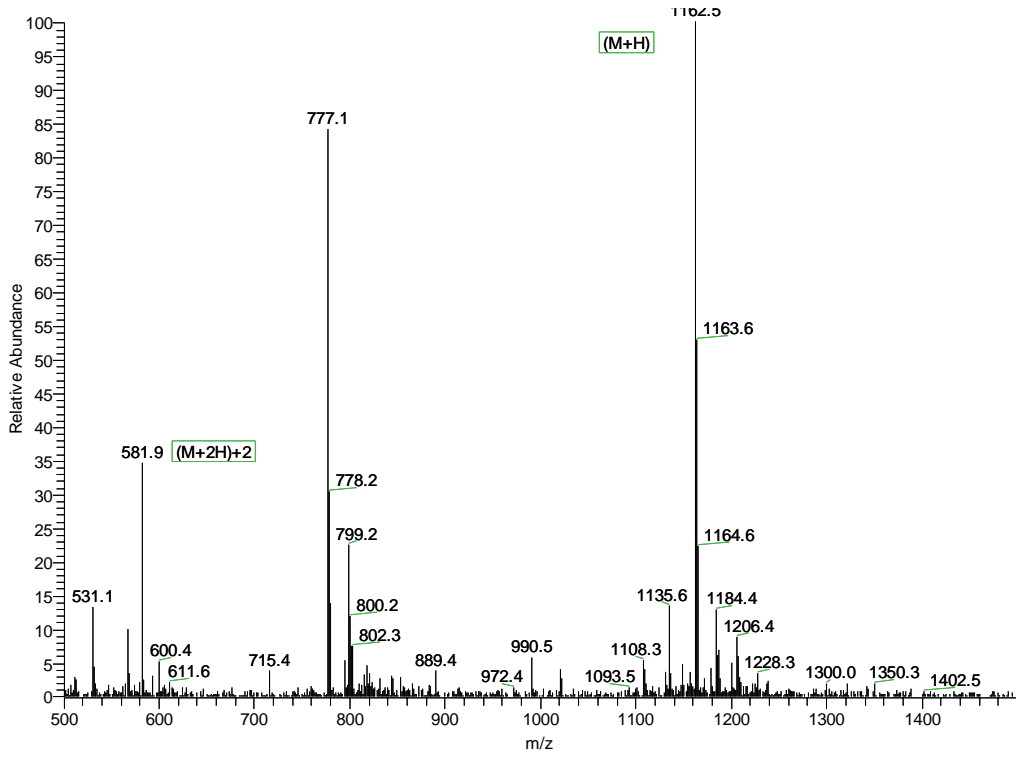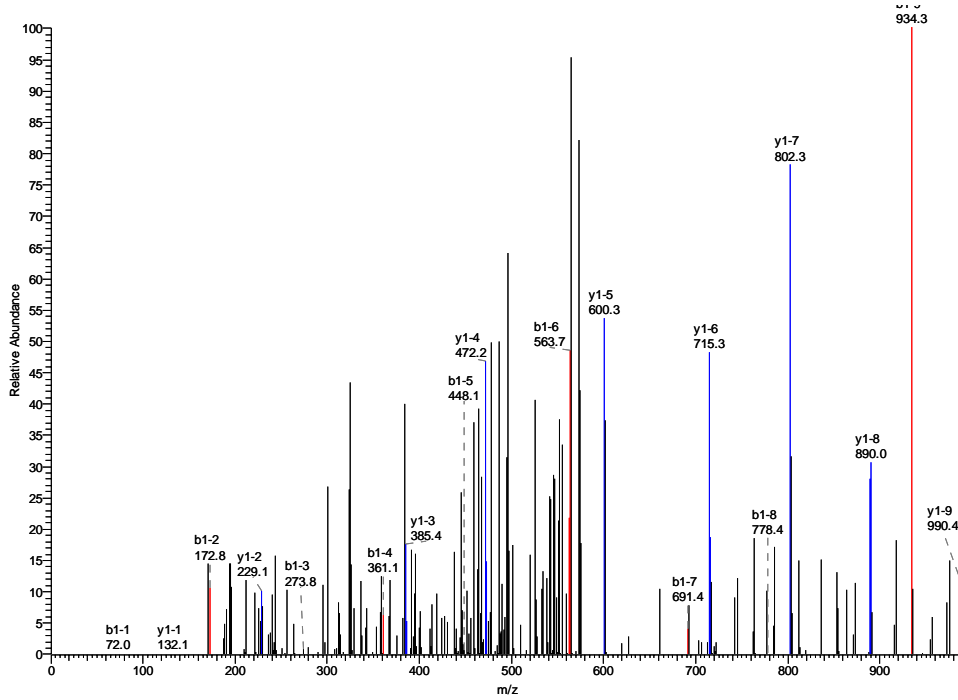

# Supplemental Figure 9f

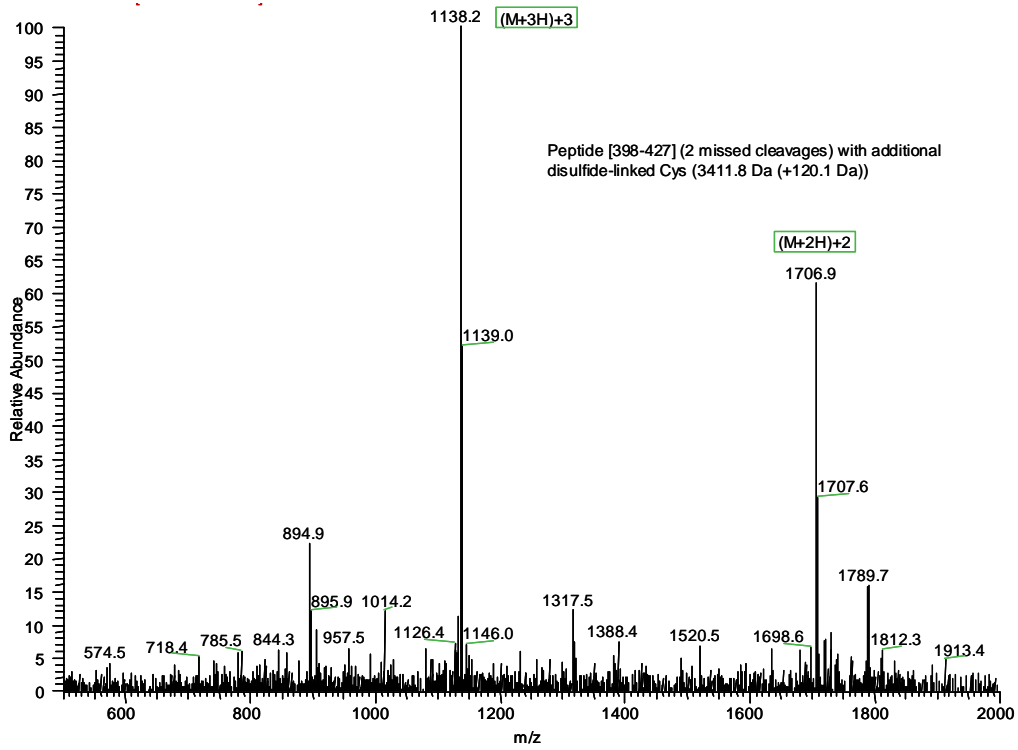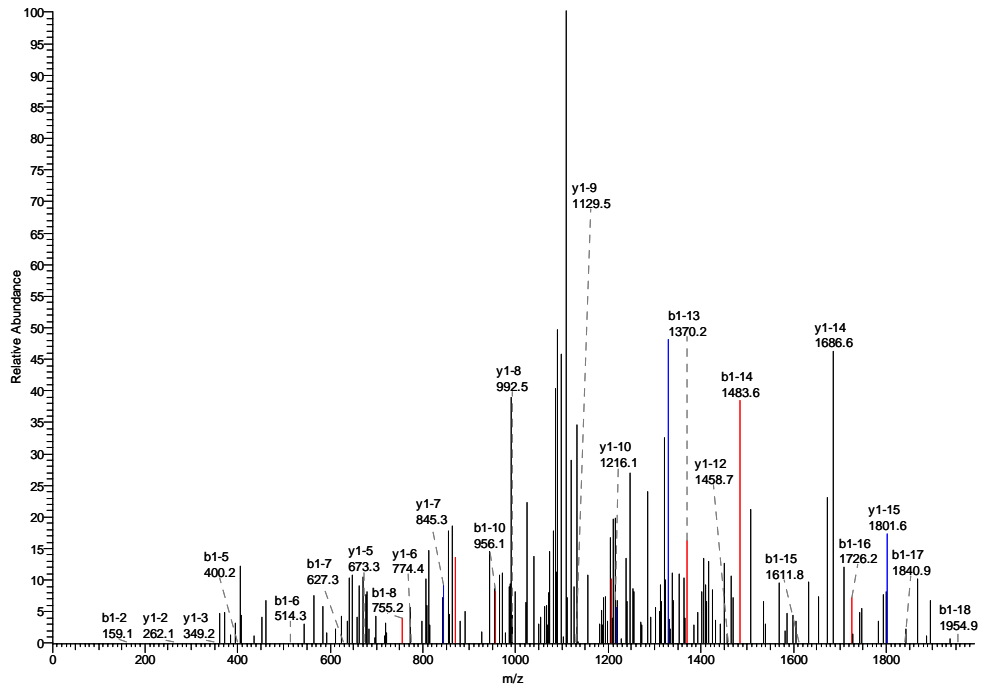

Supplement: NIHMS22004-supplement-01.pdf [file NIHMS22004-supplement-01.pdf]
